# Supplementary material
Source: MDPI journal article supplement (https://www.mdpi.com/2673-9992/2/1/10)

# *Cruciferous Vegetables-Based Isothiocyanate Compounds as Novel Epigenetic Modulators in Human Malignant Melanoma*

***Mihalis Panagiotidis, PhD***

***Senior Scientist & Department Head***

***Department of Electron Microscopy & Molecular Pathology, Cyprus Institute  
of Neurology & Genetics, Nicosia, Cyprus***

## General Features of ITCs

- Cruciferous vegetables contain vitamins, minerals, other nutrients, and chemicals known as glucosinolates
- Glucosinolates break down into several biologically active compounds (e.g. ITCs) which are being studied for possible anticancer effects
- Some of them have shown anti-cancer effects in cells and animals but studies in humans have been inconclusive)

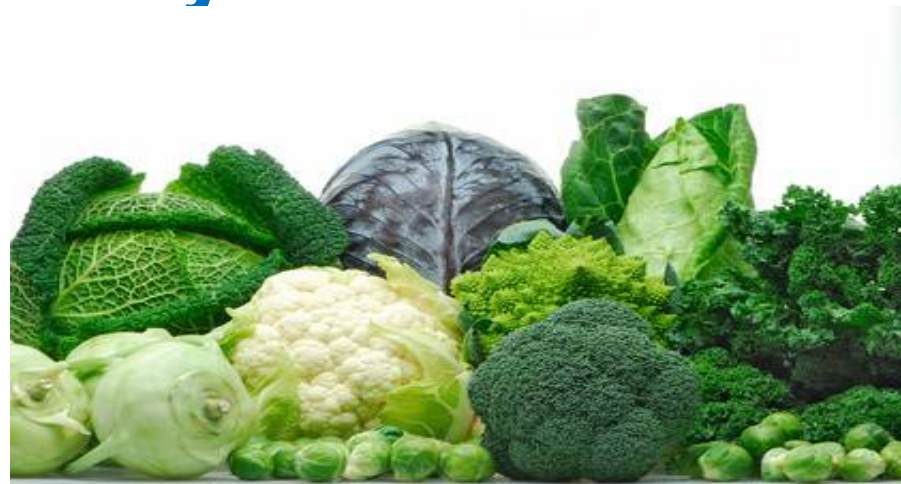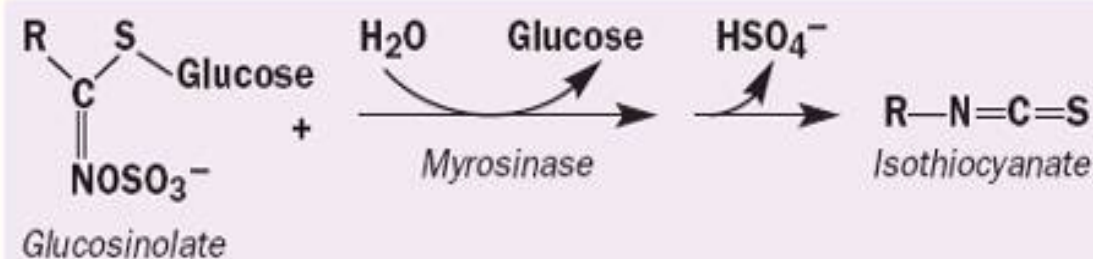

Myrosinase released by chopping or chewing cruciferous vegetables breaks down glucosinolates to isothiocyanates, releasing glucose and sulfate in the process. "R" designates side chains of other elements in the molecule. C=carbon, S=sulfur, N=nitrogen

# Major Dietary ITCs Of Interest

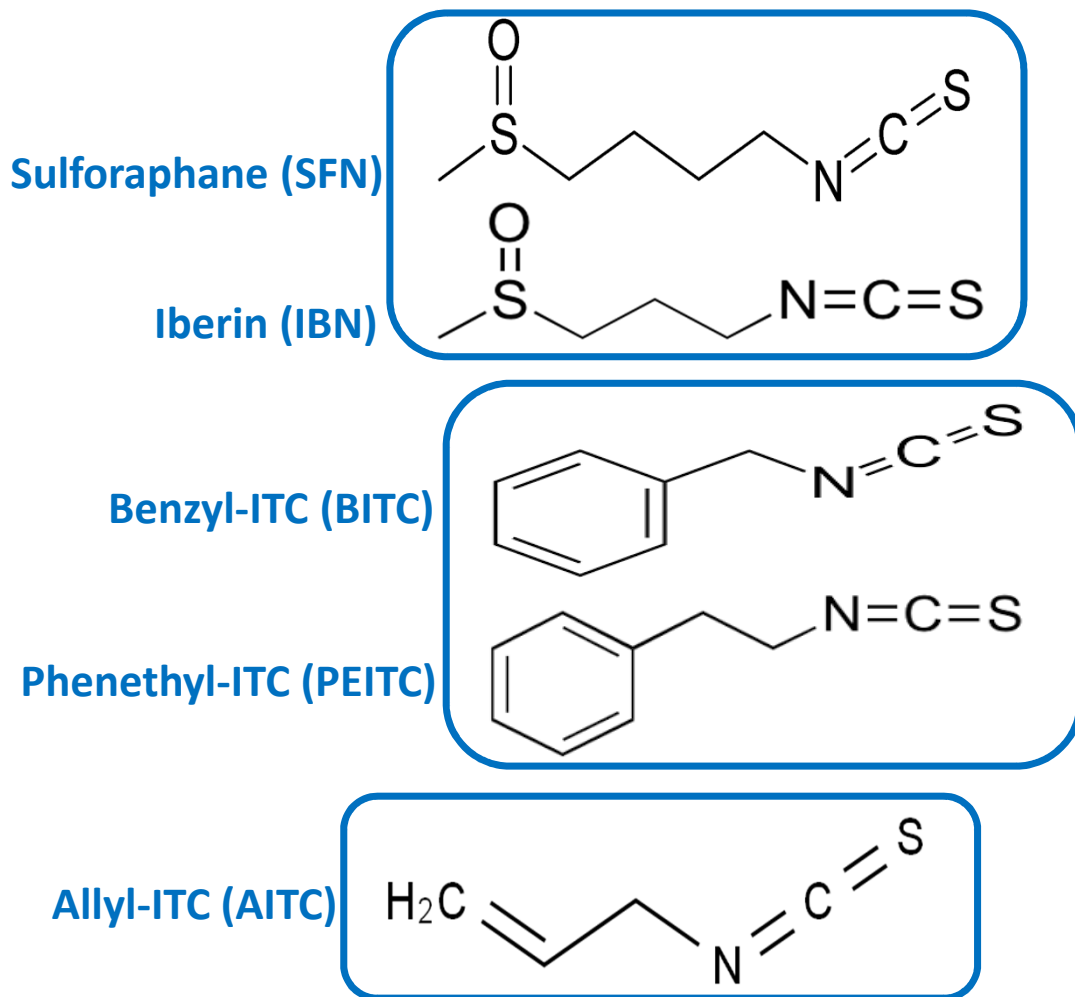

| ITC   | GL-ITC Precursor | Food Source     | Total Conc. (mg/100g) |
|-------|------------------|-----------------|-----------------------|
| SFN   | Glucoraphanin    | Broccoli        | 61                    |
|       |                  | Brussel sprouts | 236                   |
|       |                  | Cabbage         | 78                    |
| IBN   | Glucoiberin      | Cabbage         | 229                   |
|       |                  | Broccoli        | 70                    |
| BITC  | Glucotropaeolin  | Cabbage         | 78                    |
|       |                  | Garden cress    | 392                   |
| PEITC | Gluconasturtiin  | Watercress      | 94                    |
| AITC  | Sinigrin         | Broccoli        | 61                    |
|       |                  | Brussel sprouts | 236                   |
|       |                  | Cabbage         | 78                    |
|       |                  | Mustard greens  | 282                   |

# Modulation Of Various Cellular Pathways By ITCs

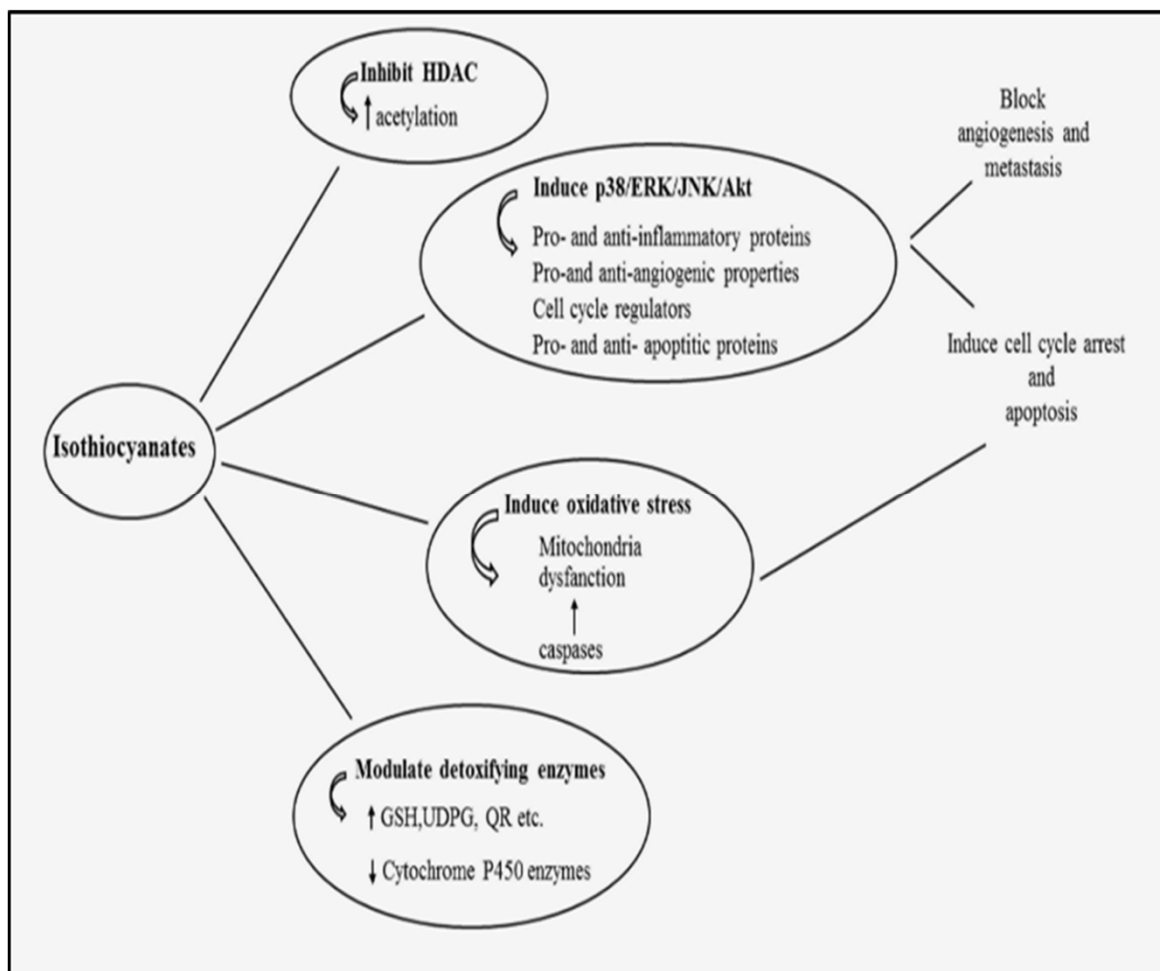

*Mitsiogianni et al. Antioxidants, 8(4): 106, 2019*

- Inhibition of Phase I and induction of Phase II enzymes
- Induction of cell cycle arrest (Mantso et al., *Anticancer Research* 36: 6303-6309, 2016)
- Promotion of apoptosis (Mantso et al., *Anticancer Research*, 2019, in press)
- **Modulation of epigenetic response**
  - ✓ HDAC inhibition
  - ✓ DNMTs inhibition
  - ✓ MicroRNA modulation
- Anti-angiogenic and anti-metastatic properties

# In Vitro Model of Human Malignant Melanoma

Stratum corneum

Stratum granulosum

Stratum spinosum

Stratum germinativum  
(basal layer)

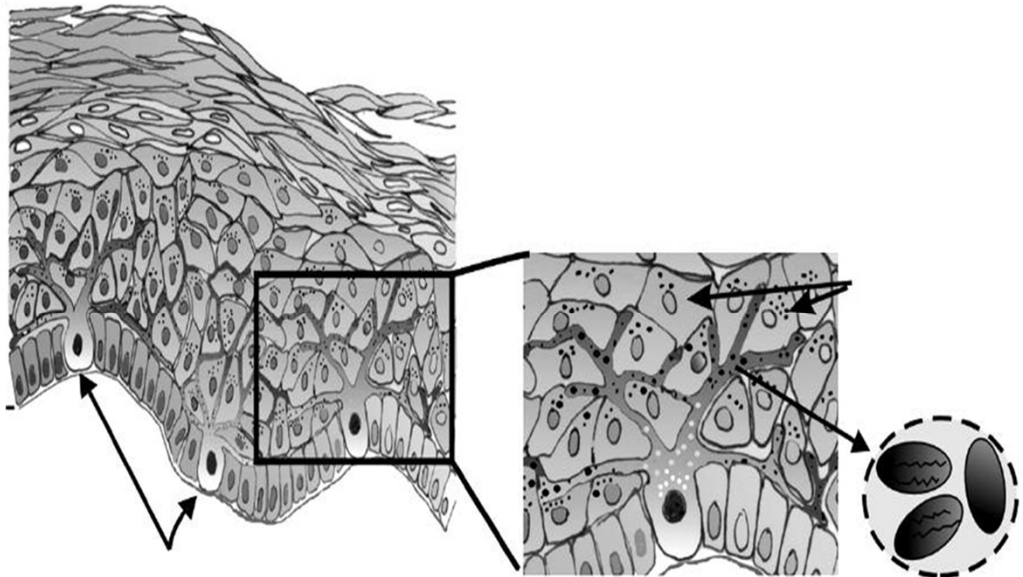

Melanosome

➤ HaCaT cells

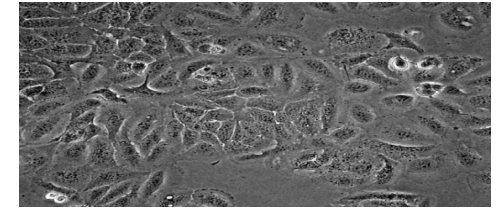

➤ A375 cells

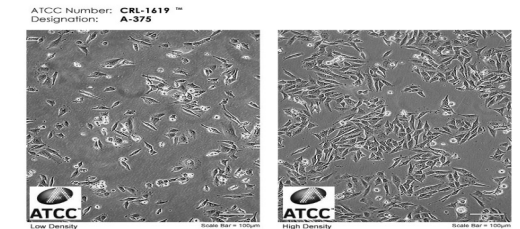

➤ A431 cells

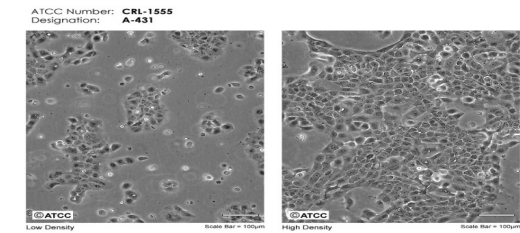

➤ VMM1 cells

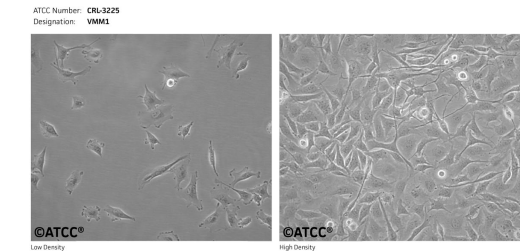

➤ HS294T cells

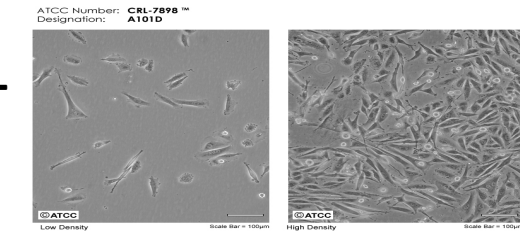

# Toxicity Profile of AITC

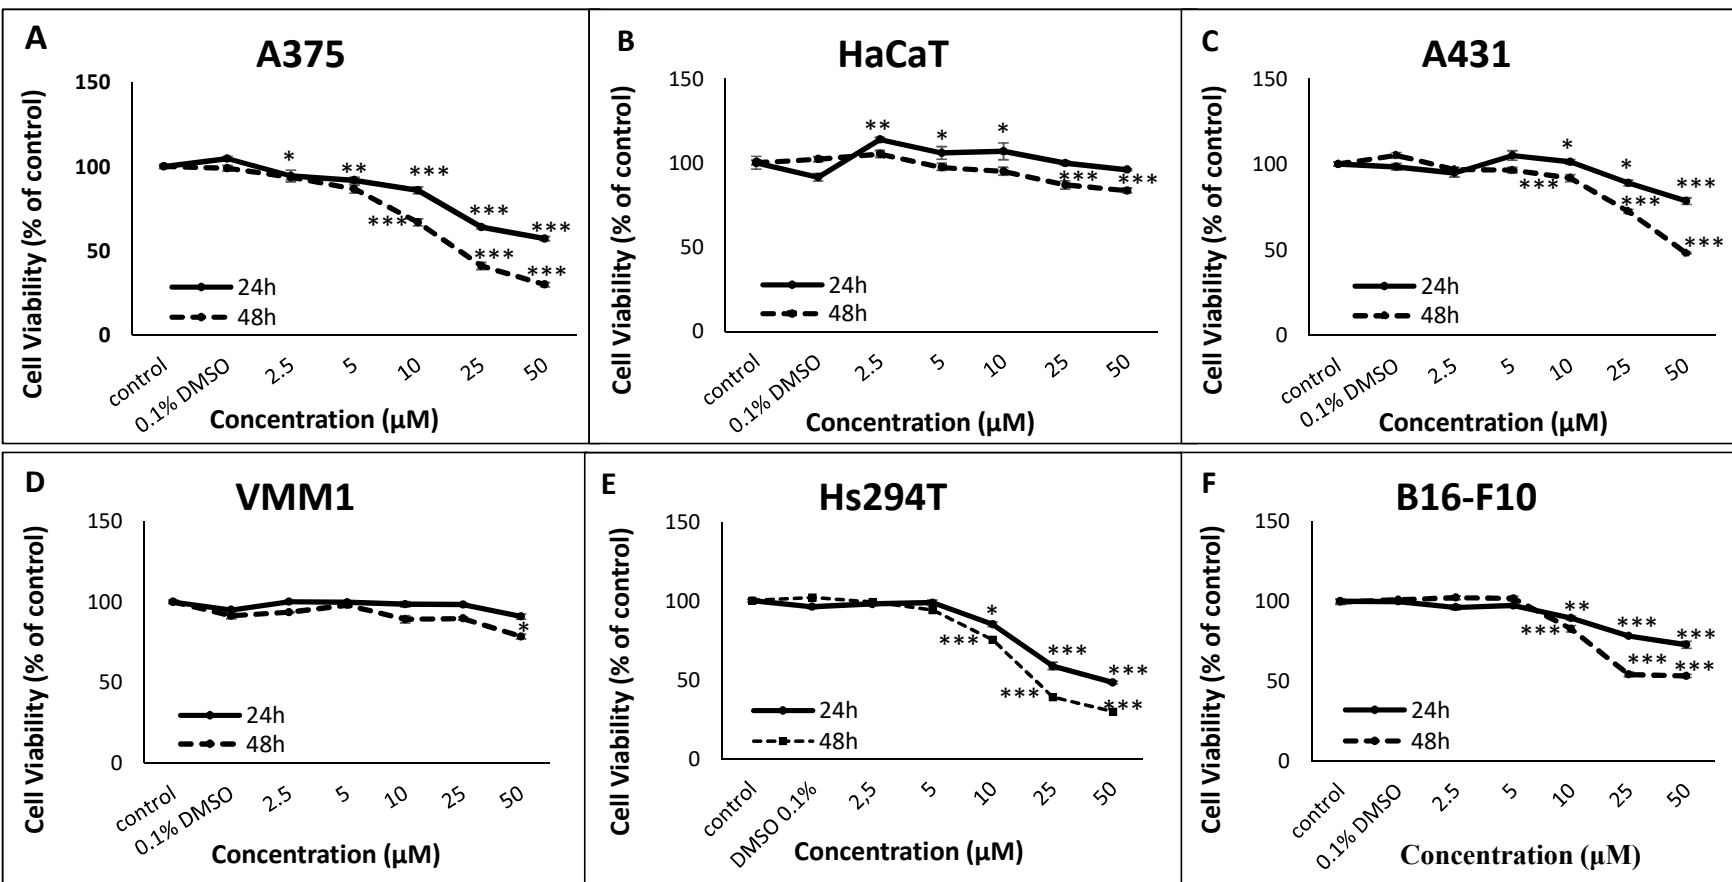

*Mitsiogianni et al.*  
*Eur J Nutr, 59(2):*  
*557-669, 2020*

|                          | A375     | HaCaT | A431        | VMM1 | Hs294T     | B16-F10    |
|--------------------------|----------|-------|-------------|------|------------|------------|
| EC50 <sub>24h</sub> (µM) | 15.6 ± 4 | ND    | ND          | ND   | 21.7 ± 4.1 | ND         |
| EC50 <sub>48h</sub> (µM) | 12 ± 0.7 | ND    | 43.4 ± 15.8 | ND   | 21.3 ± 6   | 14.9 ± 3.7 |

# Toxicity Profile of SFN, IBN, BITC & PEITC

|     |                                   | A375            | HaCaT           | A431              | VMM1            | Hs294T         | B16-F10          |
|-----|-----------------------------------|-----------------|-----------------|-------------------|-----------------|----------------|------------------|
| SFN | EC50 <sub>24h</sub><br>( $\mu$ M) | 15.7 $\pm$ 0.15 | 21.6 $\pm$ 2.00 | 46.05 $\pm$ 12.04 | 35.3 $\pm$ 11.7 | 8.97 $\pm$ 0.8 | 20.88 $\pm$ 2.00 |
|     | EC50 <sub>48h</sub><br>( $\mu$ M) | 15.6 $\pm$ 2.4  | 23.3 $\pm$ 2.4  | 20.87 $\pm$ 0.96  | 24.11 $\pm$ 1.3 | 6.5 $\pm$ 0.12 | 15.37 $\pm$ 0.5  |
| IBN | EC50 <sub>24h</sub><br>( $\mu$ M) | 8.3 $\pm$ 1.06  | 23.56 $\pm$ 4.4 | 48.51 $\pm$ 16.1  | 50.5 $\pm$ 9.5  | 11.3 $\pm$ 2.6 | 21.09 $\pm$ 0.9  |
|     | EC50 <sub>48h</sub><br>( $\mu$ M) | 8.6 $\pm$ 0.7   | 23.6 $\pm$ 1.9  | 15.26 $\pm$ 1.8   | 23.05 $\pm$ 1.2 | 8.96 $\pm$ 1.6 | 19.97 $\pm$ 5.4  |

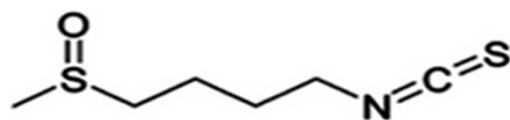

SFN

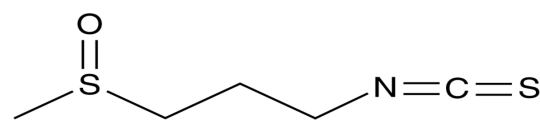

IBN

*Mitsiogianni et al. Eur J Nutr, 2020 (in press)*

# Overview Of Cancer Epigenetics

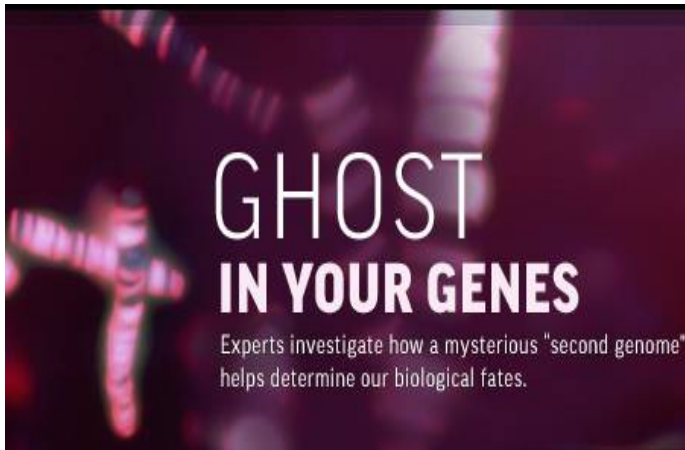

**Epigenetics (above genetics)**  
Stable and heritable changes in gene expression and chromatin organization but independent of the DNA coding sequence itself

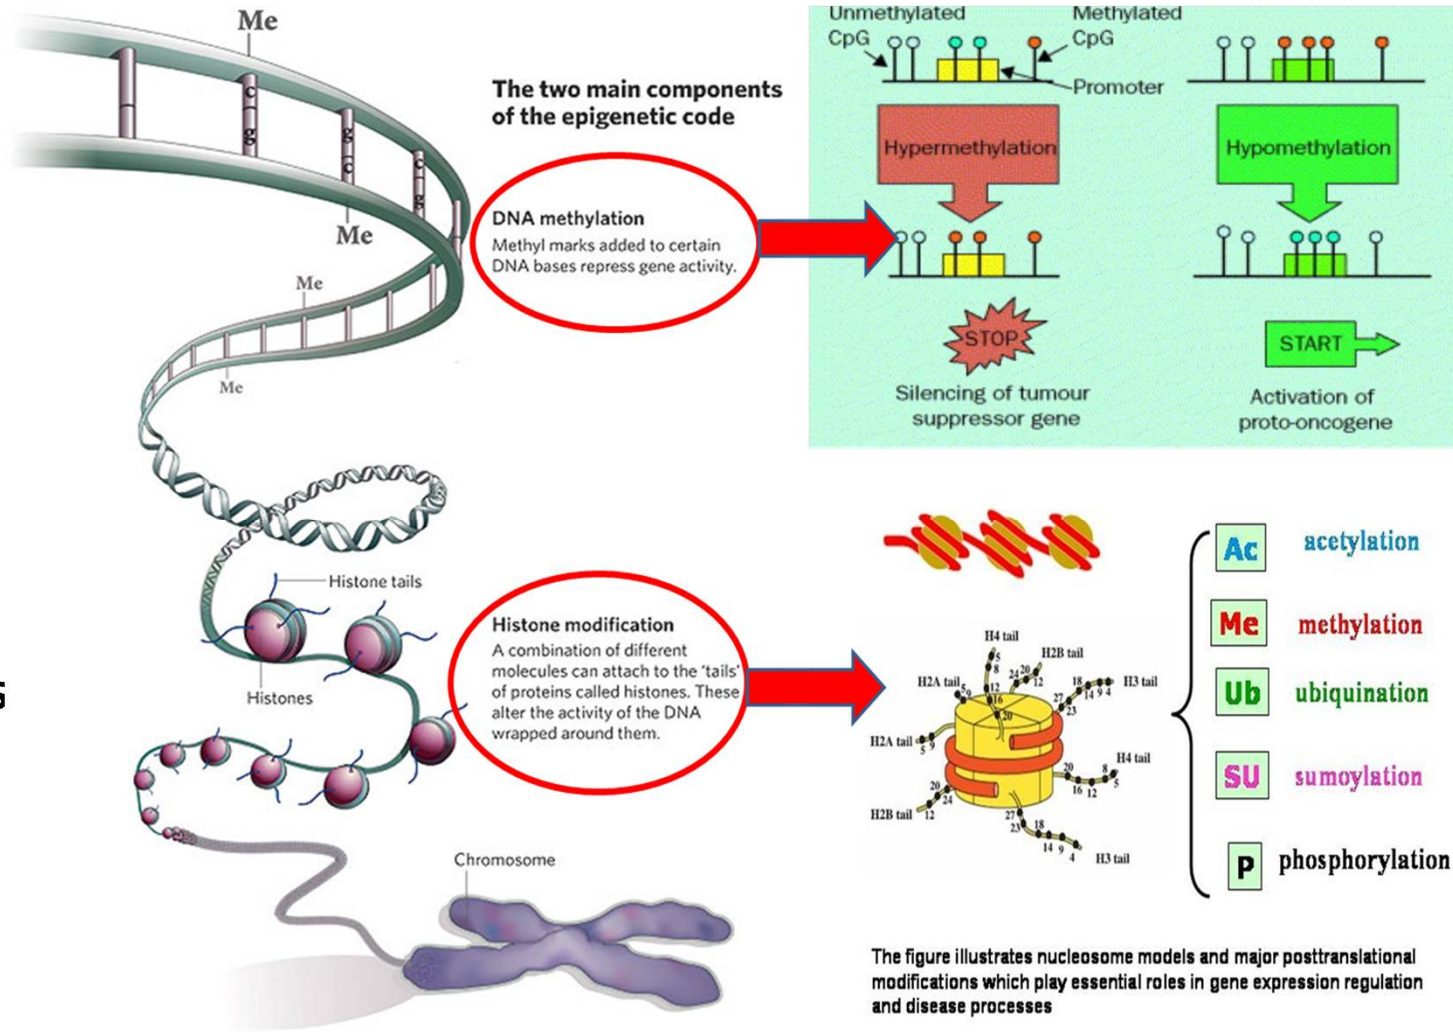



# *The Concept of Epigenetic Diet: How What We Eat Could Affect Tags on Our DNA*

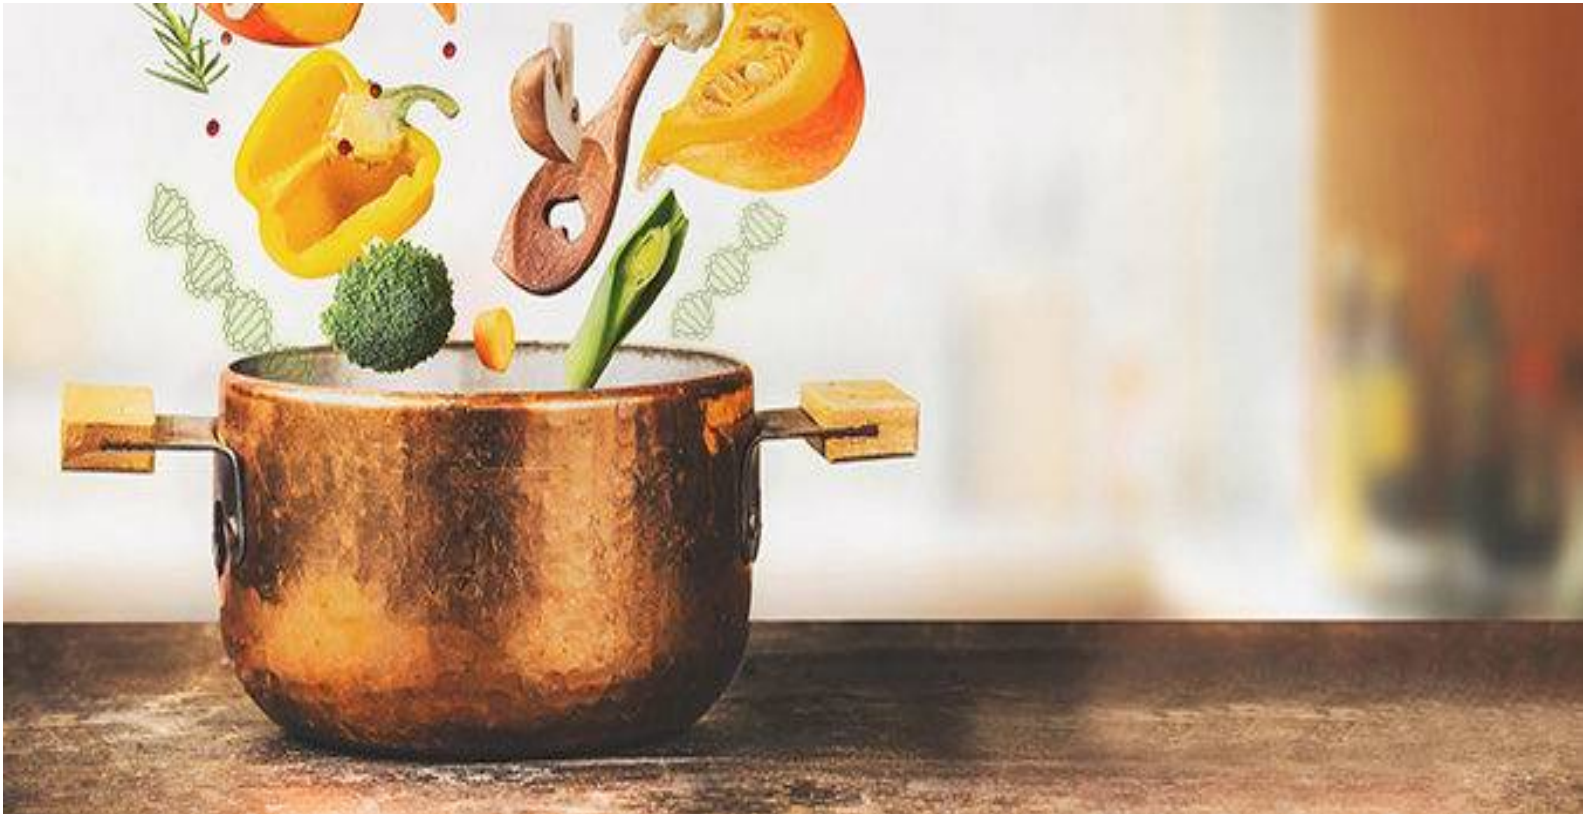

# Dietary Inhibitors of DNA Methyltransferases

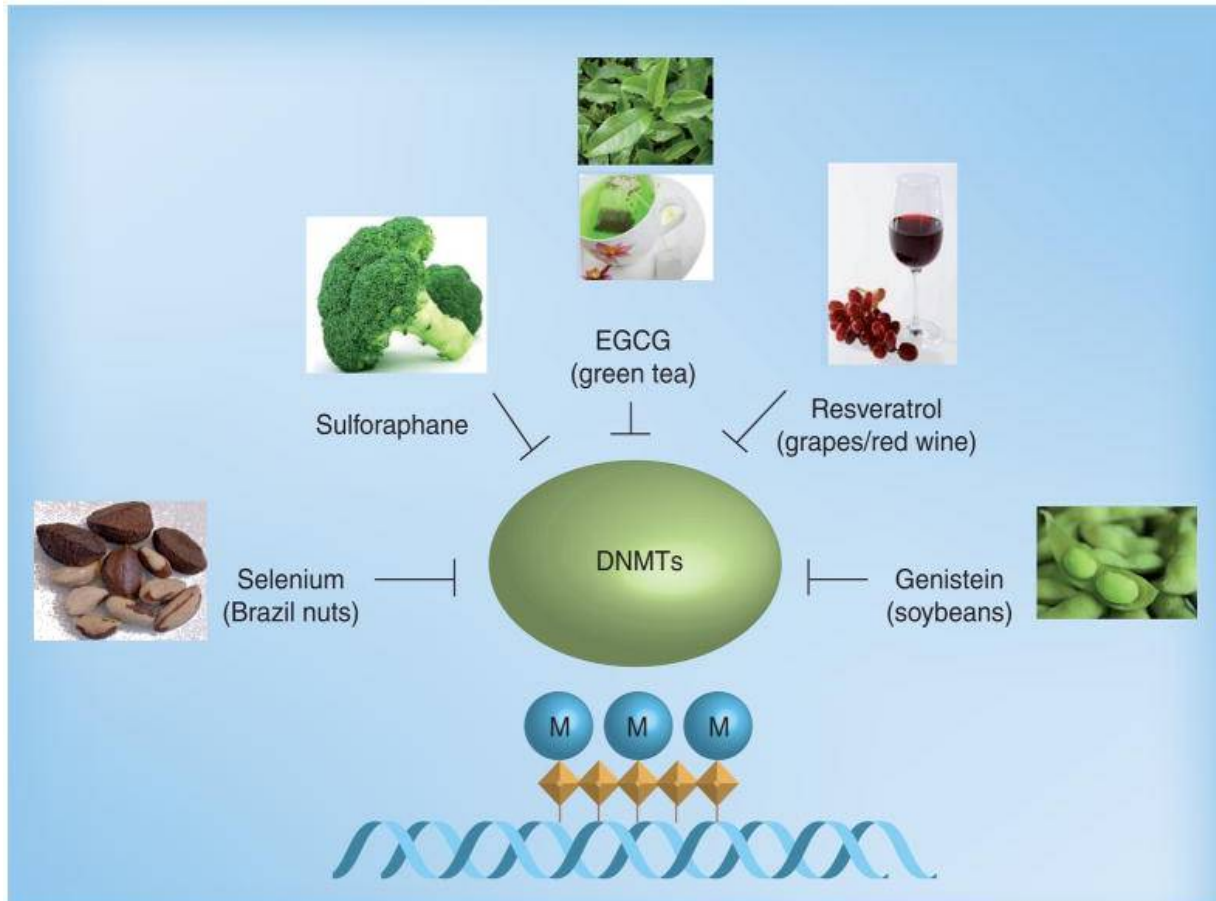

- **Hypermethylation of CpG dinucleotides, by DNMTs, usually results in transcriptional gene silencing and gene inactivation**
- **Several bioactive compounds act as dietary inhibitors of DNA methyltransferases and also alter gene expression via epigenetic mechanisms**

*Hardy, TM & Tollefsbol, TO. Epigenomics, 3(4): 503-518, 2011*

# Dietary Modifiers of Histones

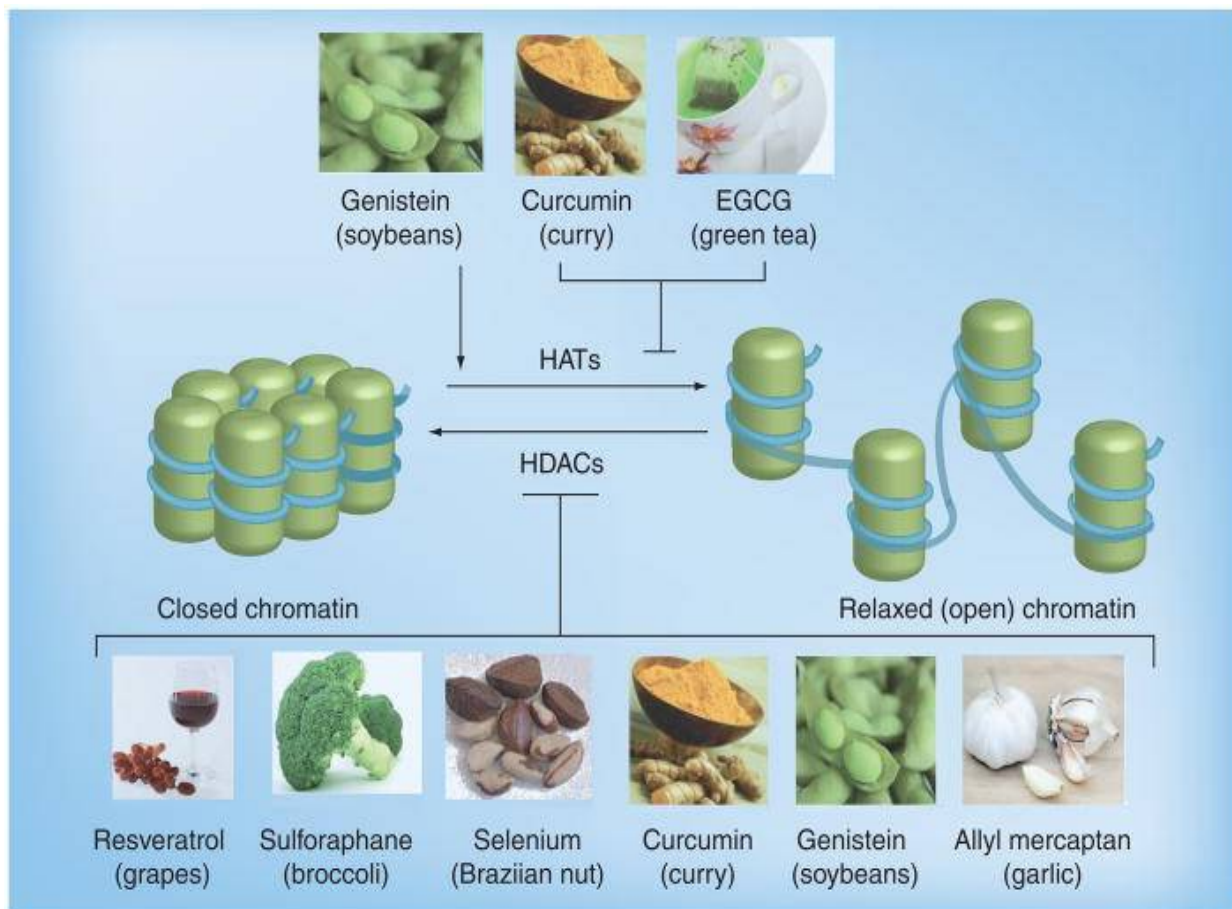

- Bioactive compounds can alter HATs and HDACs by causing conformational changes in chromatin structure thereby altering gene expression
- HATs induce a relaxed chromatin state indicative of gene expression whereas chromatin in its closed state is indicative of gene silencing and repression

*Hardy, TM & Tollefsbol, TO. Epigenomics, 3(4): 503-518, 2011*

## DIETARY COMPOUNDS

EC, ECG, EGC and EGCG

Resveratrol

Curcumin

Genistein

Isothiocyanates, sulforaphane

Selenium

Allyl mercaptan, organosulfur  
compounds

Folate

Alcohol

## FOOD SOURCES

Green tea

Grapes, peanuts, mulberries,  
cranberries, blueberries

Tumeric, curry

Soybeans, fava beans

Broccoli, cabbage, kale, watercress

Brazilian nuts, chicken, game meat,  
beef

Garlic

Beans, grains, fortified breakfast  
cereals, pastas, green vegetables

Alcoholic beverages

## EPIGENETIC FUNCTIONS

DNMT and HAT inhibitor, modulates  
miRNA

DNMT and HDAC inhibitor

DNMT inhibitor and miRNA modulator

DNMT and HDAC inhibitor, enhances  
HATs, modulates miRNA

DNMT and HDAC inhibitor

DNMT and HDAC inhibitor

HDAC inhibitor

Deficiencies alter DNA methylation  
patterns

High consumption increases promoter  
hypermethylation

*Hardy, TM & Tollefsbol, TO. Epigenomics, 3(4): 503-518, 2011*

# Histone Modifications Capable of Altering Gene Expression

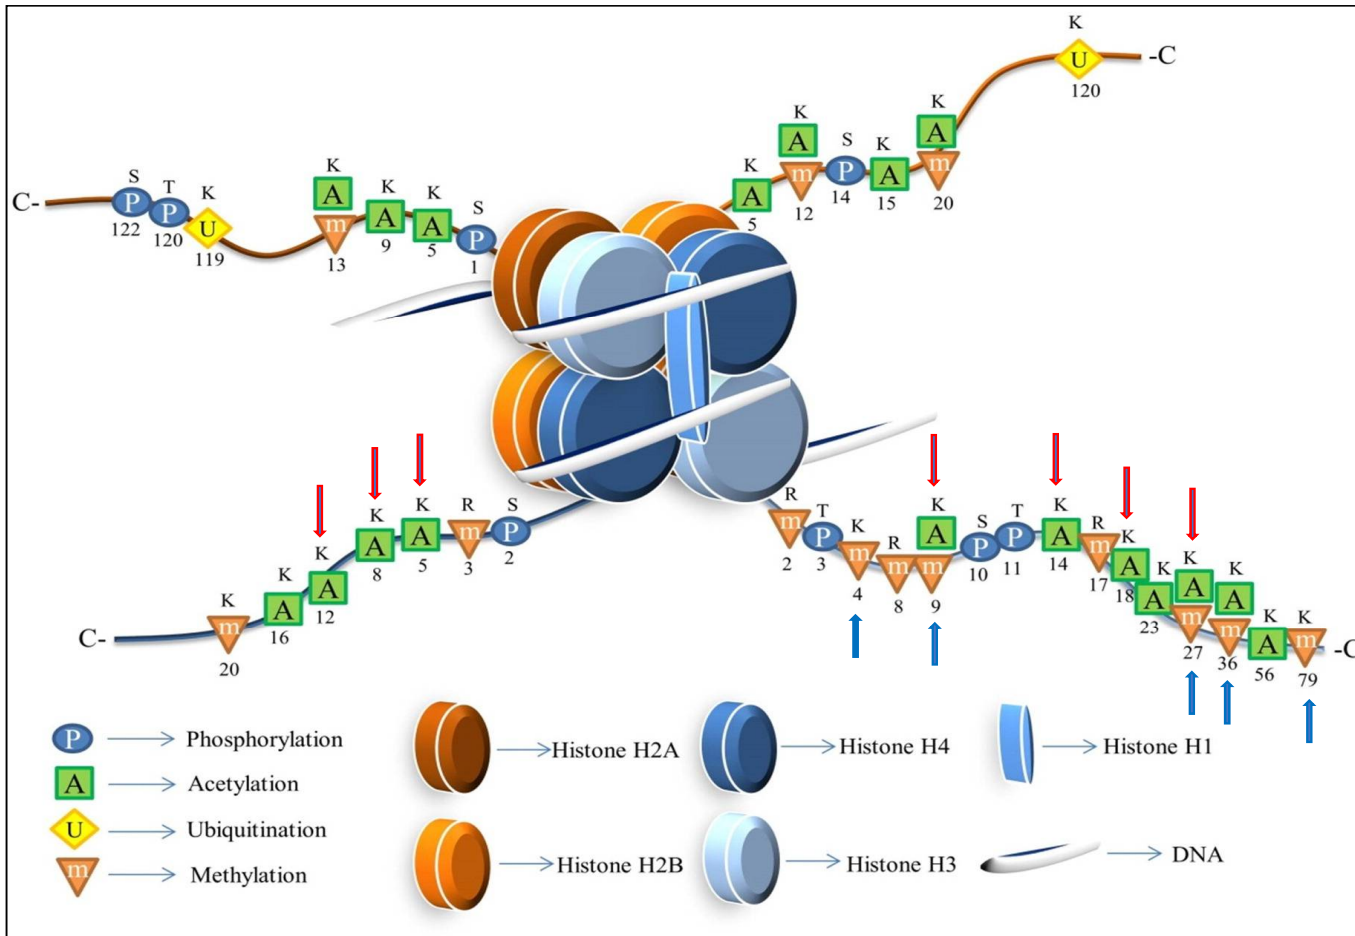

- Histone N-terminal tail has a crucial role in modulating nucleosome structure and function.
- Various modifications on different residues of histone tail are shown
- S, T, K and R represent Serine, Threonine, Lysine & Arginine respectively

# AITC Induces The Epigenetic Response

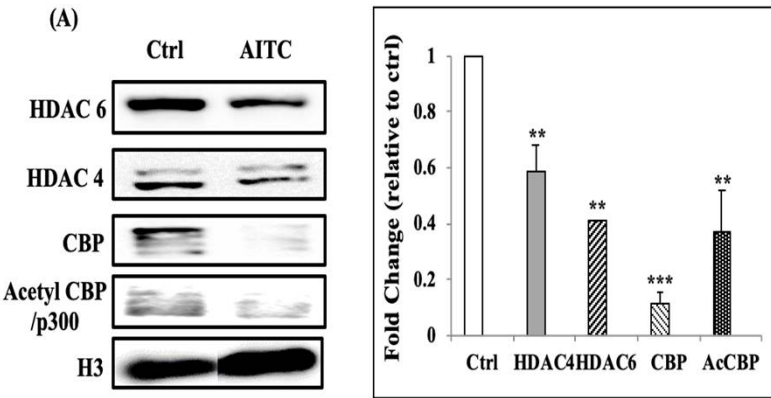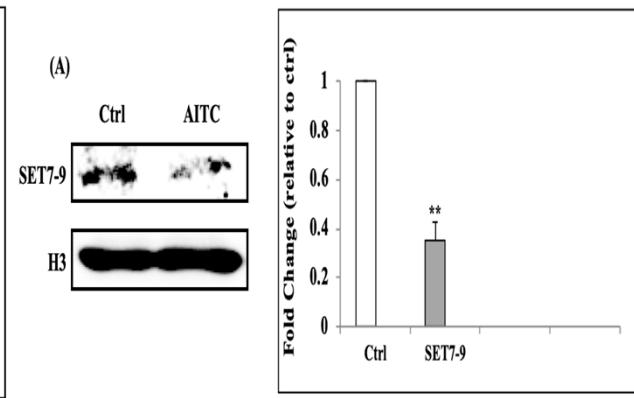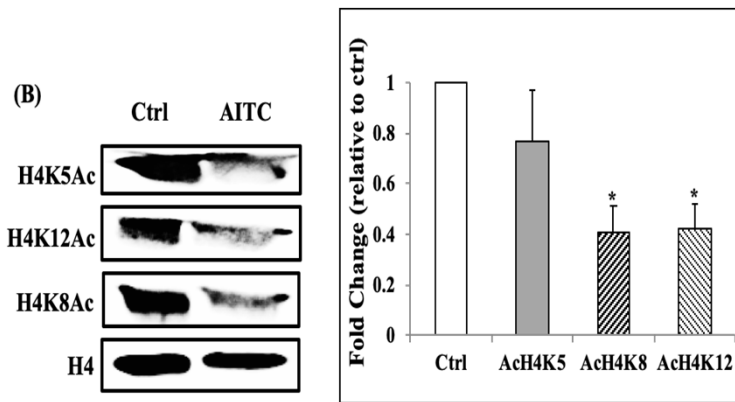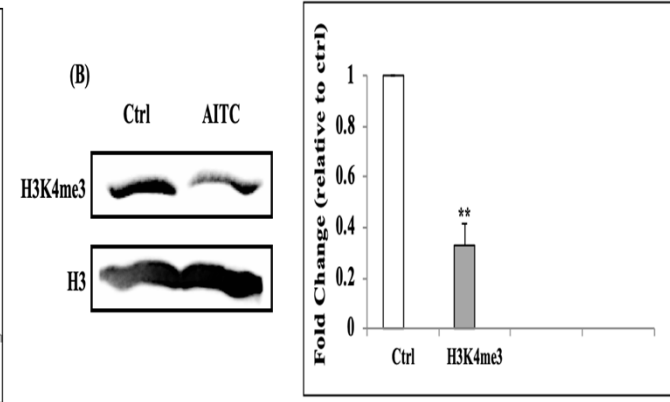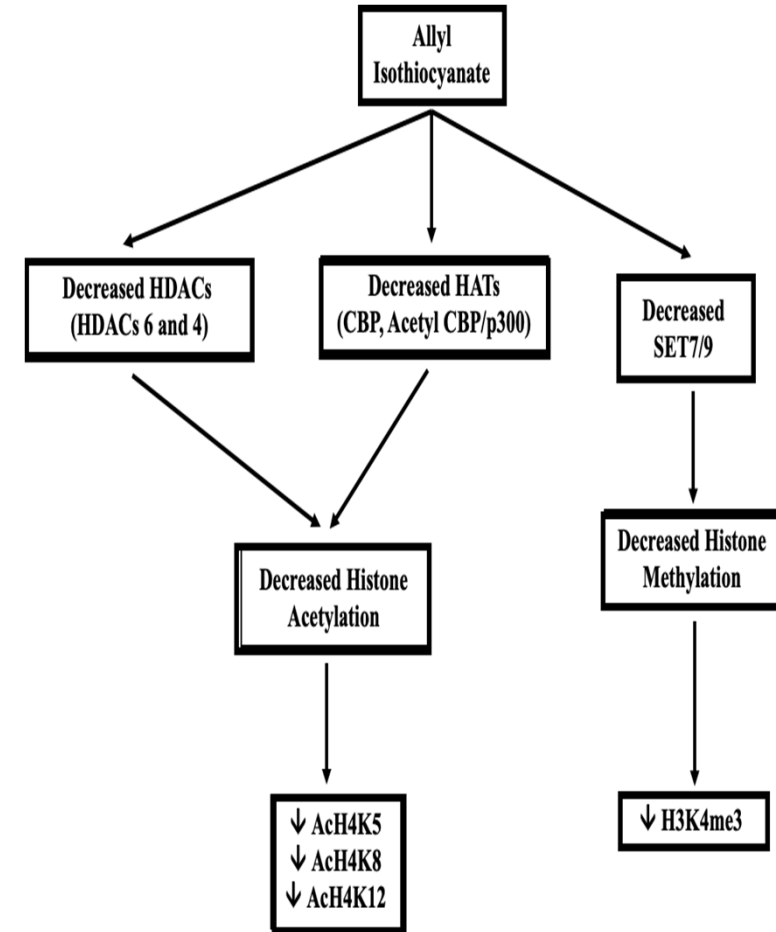

# SFN & IBN Induce The Epigenetic Response

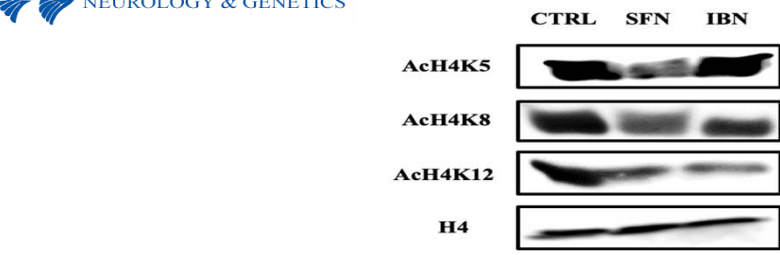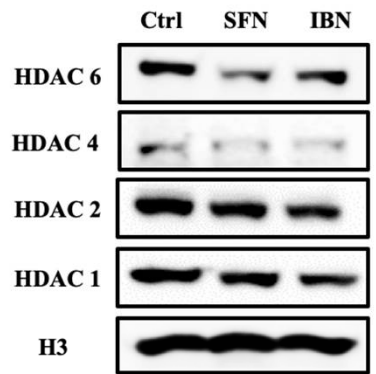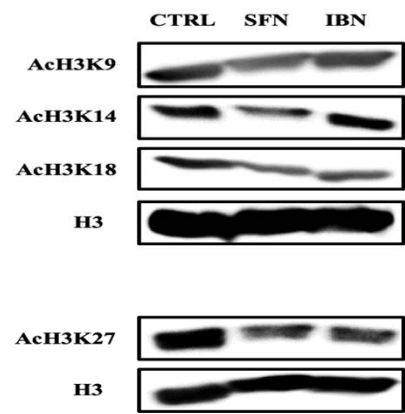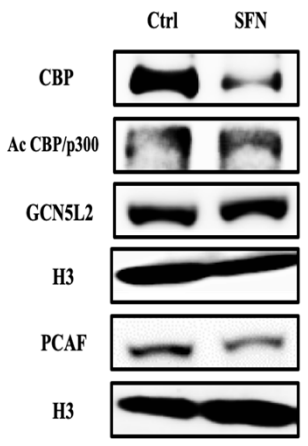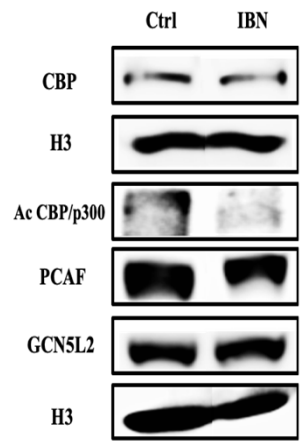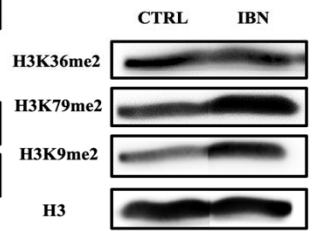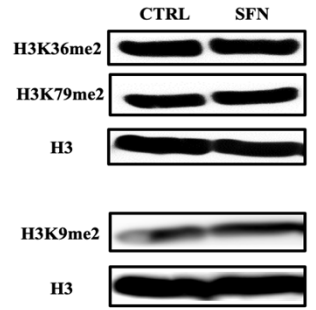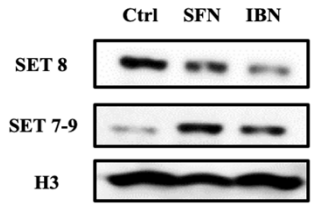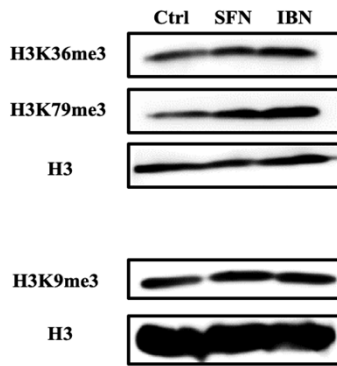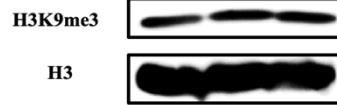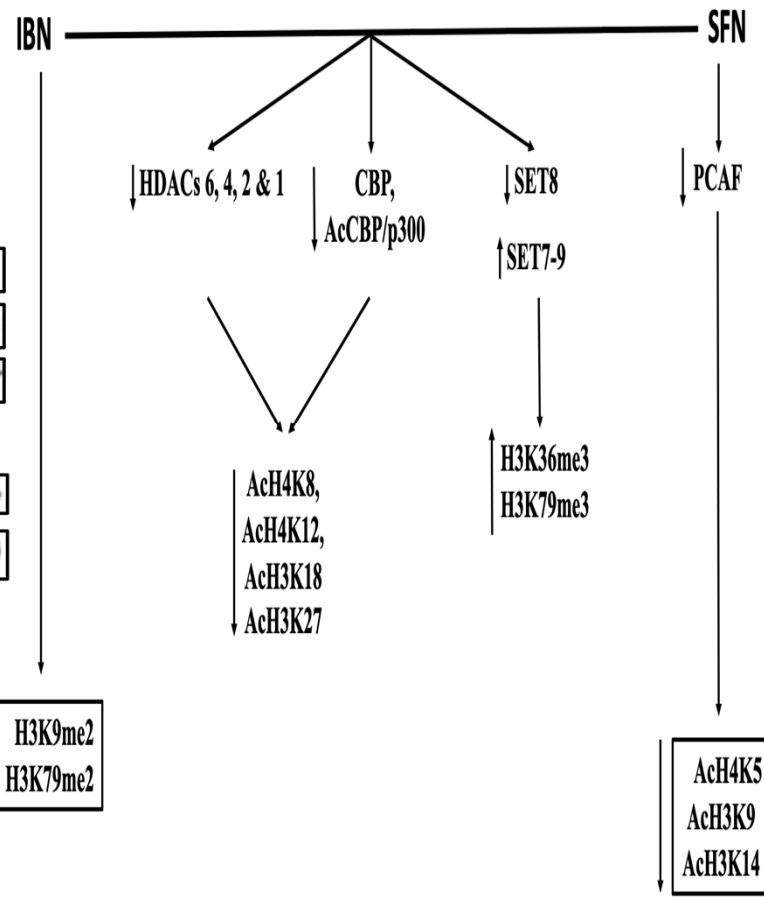

Mitsiogianni et al. Eur J Nutr, 2020 (in press)

# Inhibition Of DNMT1A Potentiates the Effect of AITC

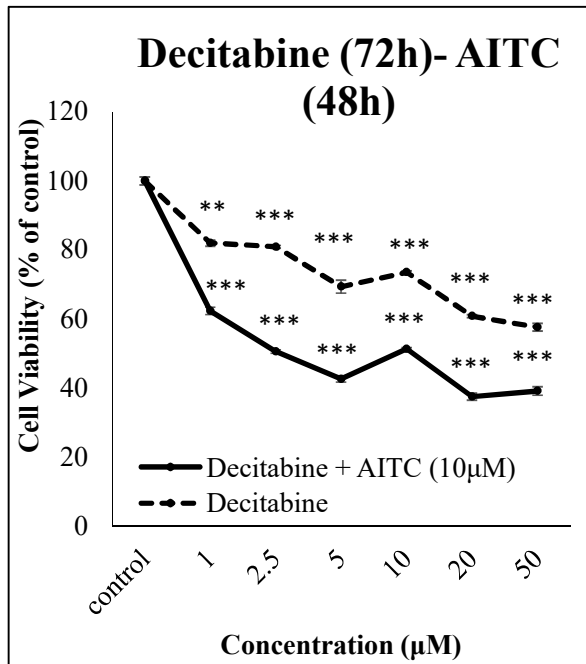

Pre-treatment with Decitabine, for 24 hrs, followed by co-treatment with AITC and Decitabine for 48 hrs

Mitsiogianni et al. Eur J Nutr, 59(2): 557-669, 2020

## DNA Methyltransferase Inhibitors (“Hypomethylating” or “Epigenetic” Agents)

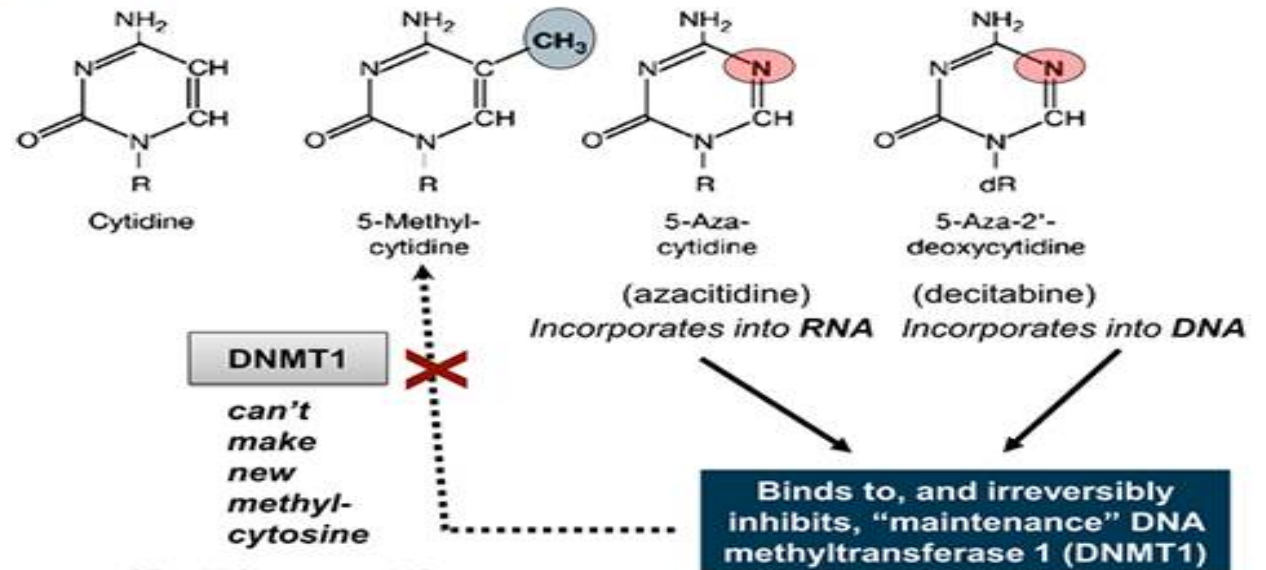

Image courtesy of David Steensma, MD

If a tumor-suppressor gene is not being transcribed in a malignant cell, treating with a DNA-methyltransferase inhibitor can open the chromatin and change the level at which transcription is occurring, thereby killing the malignant cell. This is the hypothesis for how Azacytidine and Decitabine are working in MDS

www.medscape.org



# Inhibition Of HDAC Potentiates the Effect of AITC

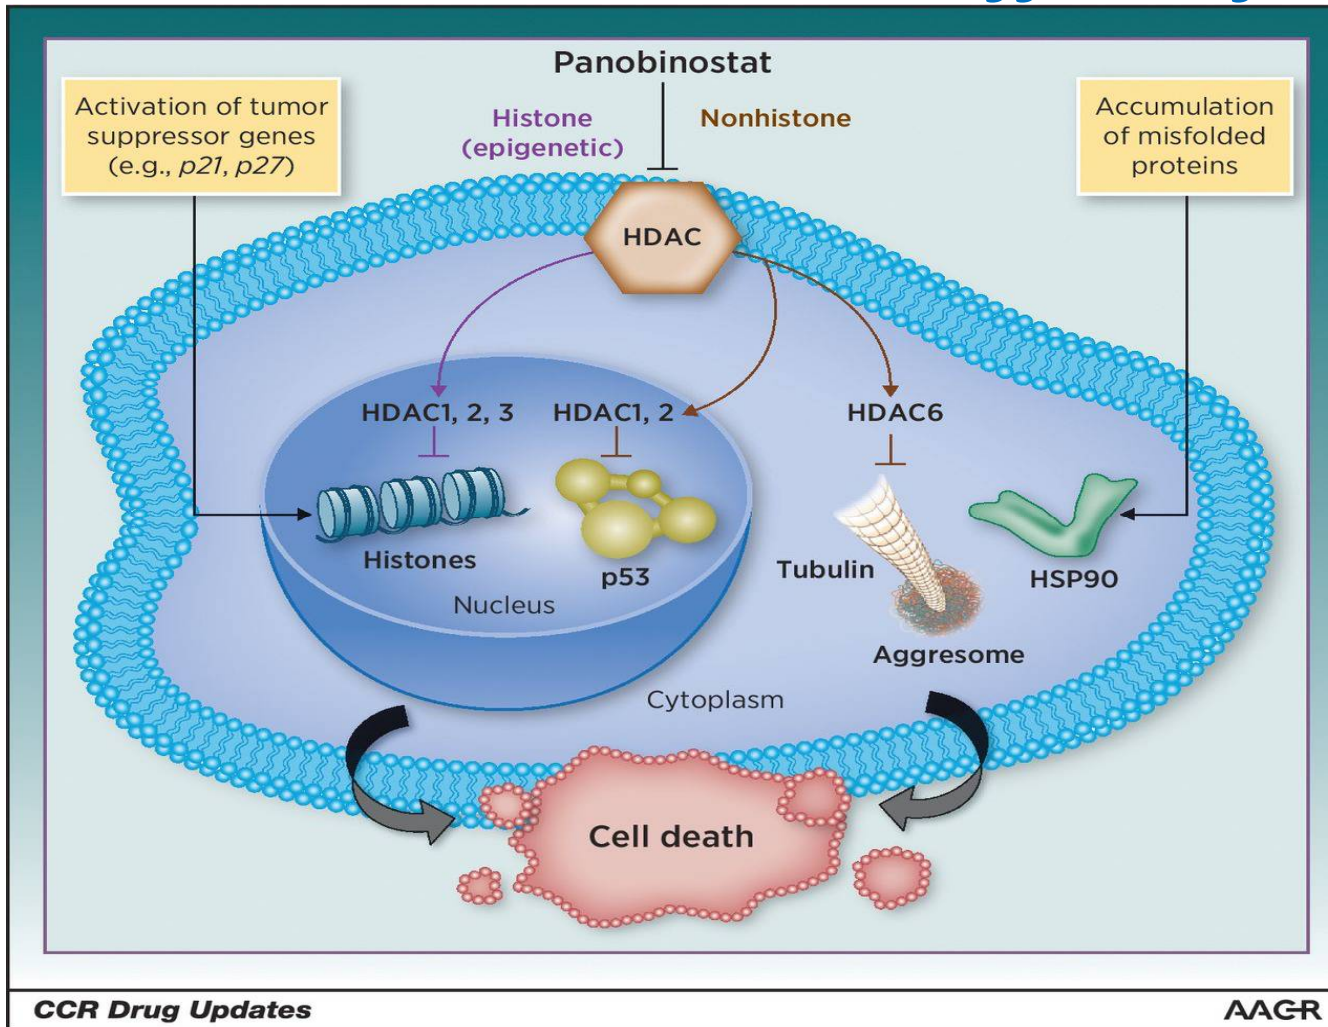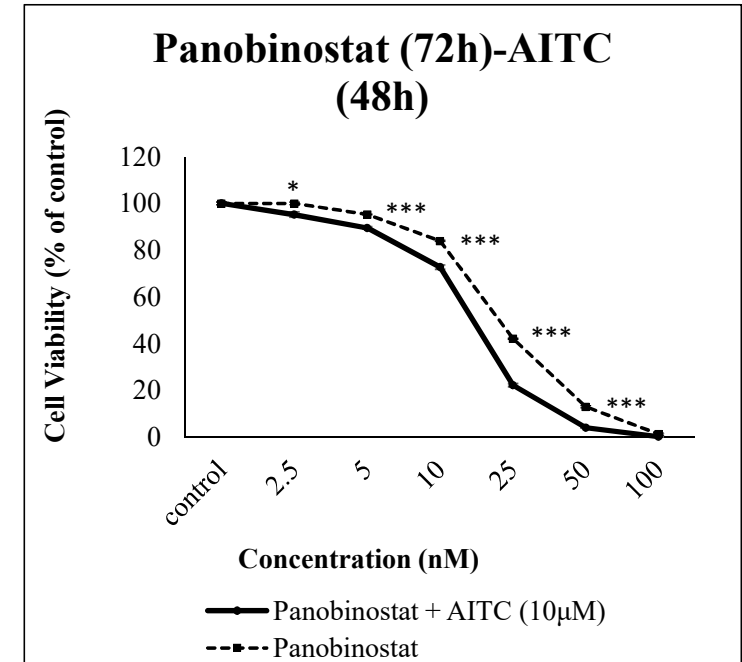

Pre-treatment with Panobinostat, for 24 hrs, followed by co-treatment with AITC and Panobinostat for 48 hrs

*Mitsiogianni et al. Eur J Nutr, 59(2): 557-669, 2020*

# Inhibition Of HAT Potentiates the Effect of AITC

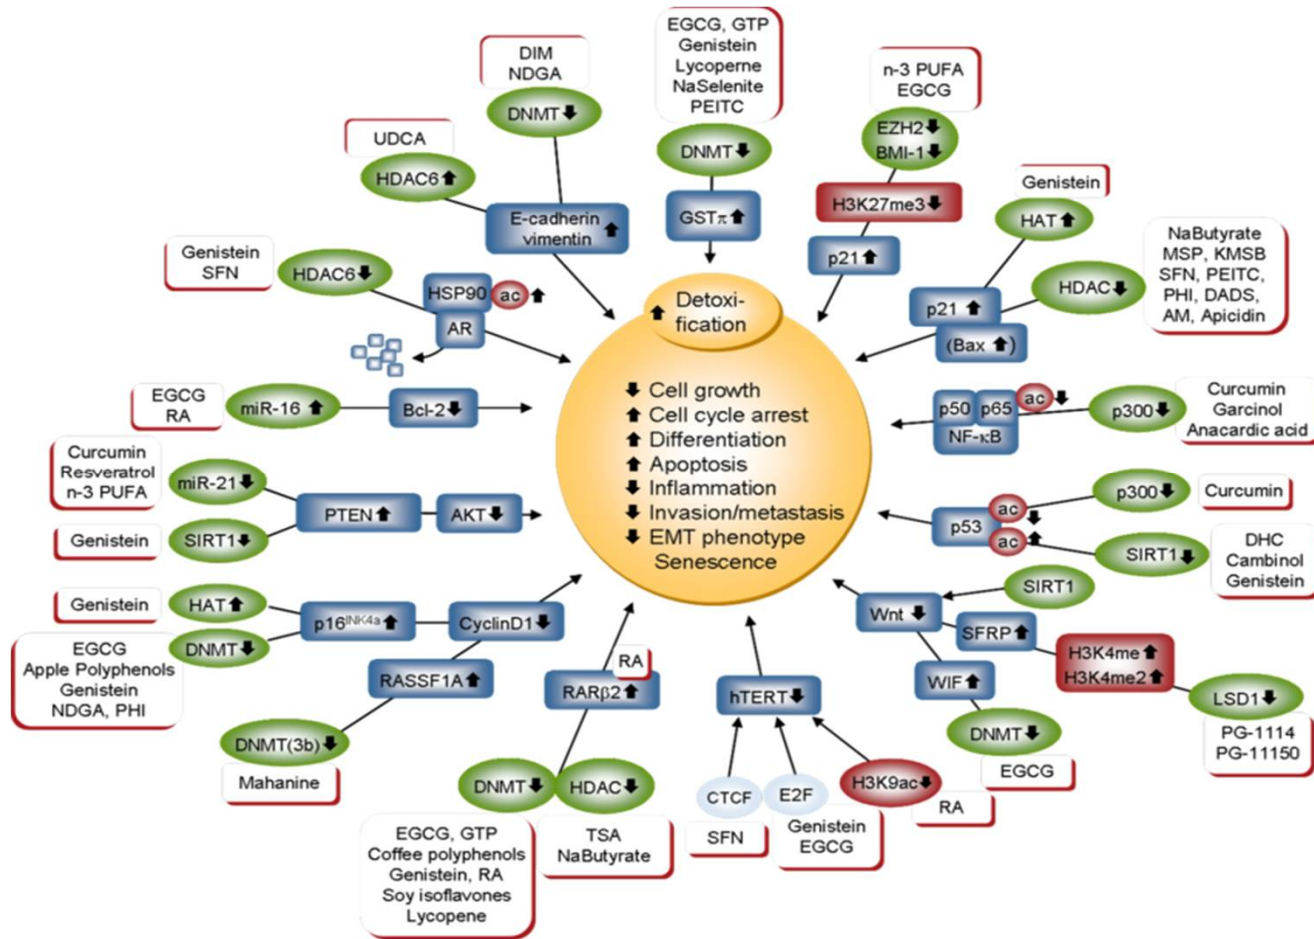

[www.researchgate.net](http://www.researchgate.net)

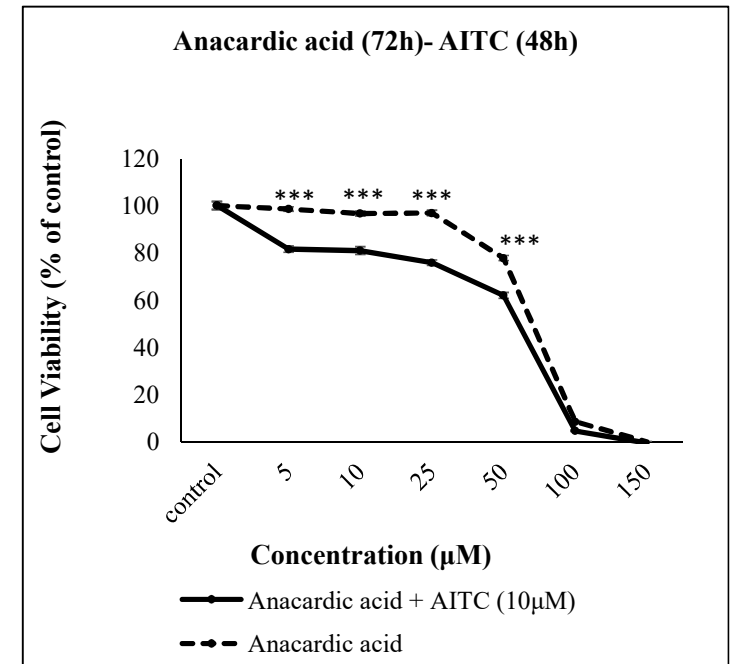

Pre-treatment with Anacardic Acid, for 24 hrs, followed by co-treatment with AITC and Anacardic Acid for 48 hrs

Mitsiogianni et al. *Eur J Nutr*, 59(2): 557-669, 2020

# Epigenetic Therapy & HDACi

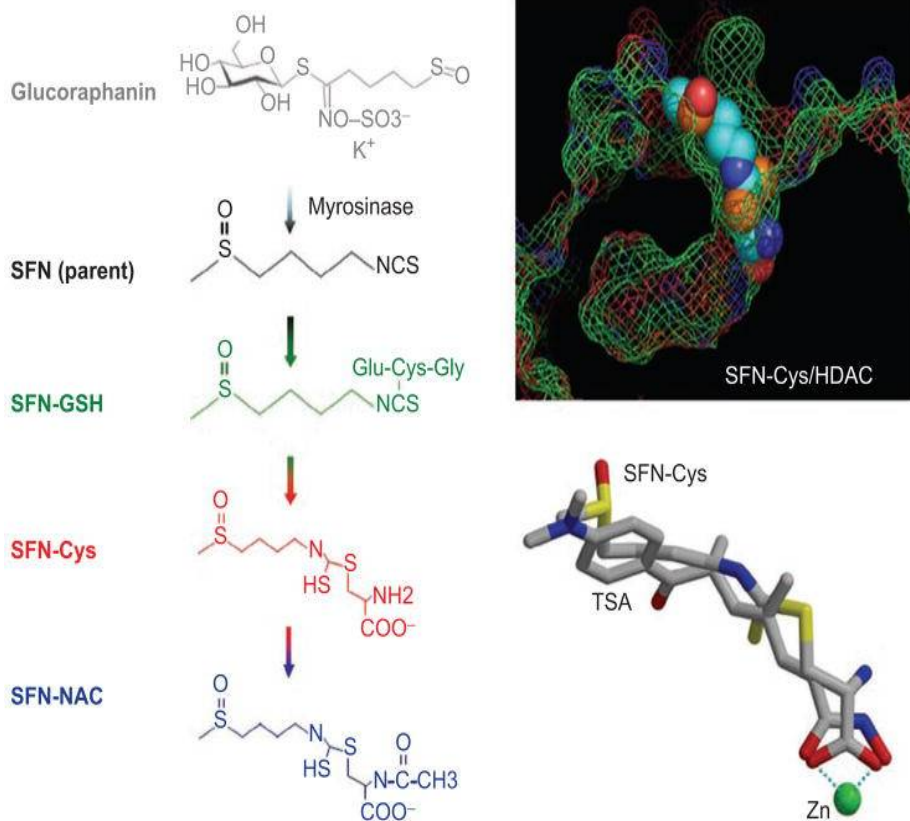

Modelling of ITCs as HDAC inhibitors  
by computer-aided drug design

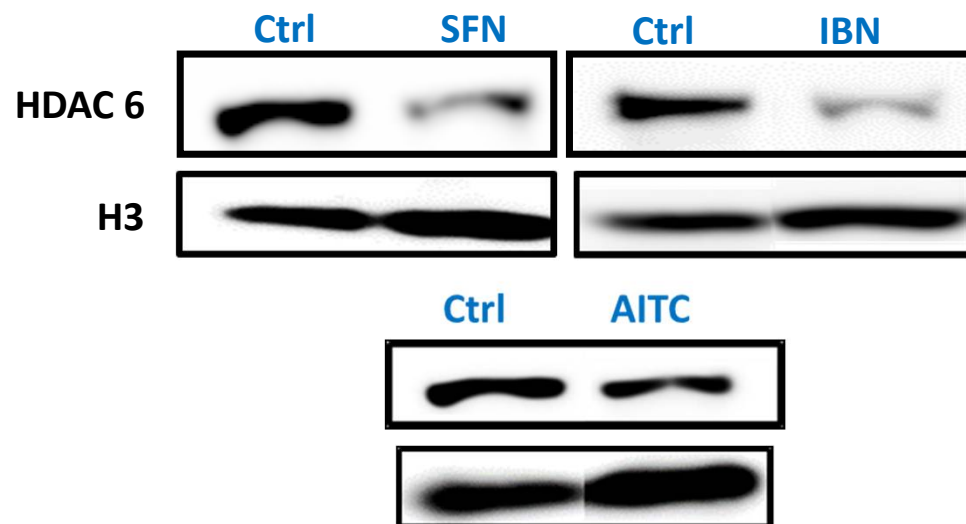

Order of HDAC inhibition by SFN *in vitro*:

**SFN-Cys** > **SFN-NAC** > **SFN-GSH** >> **SFN**

*Mitsiogianni et al. Eur J Nutr, 59(2): 557-669, 2020*

*Mitsiogianni et al. Eur J Nutr, 2020 (in press)*

*Rajendran et al. Crit Rev Biochem Mol Biol, 46(3): 181-199, 2011*

# Epigenetic Therapy & HDACi

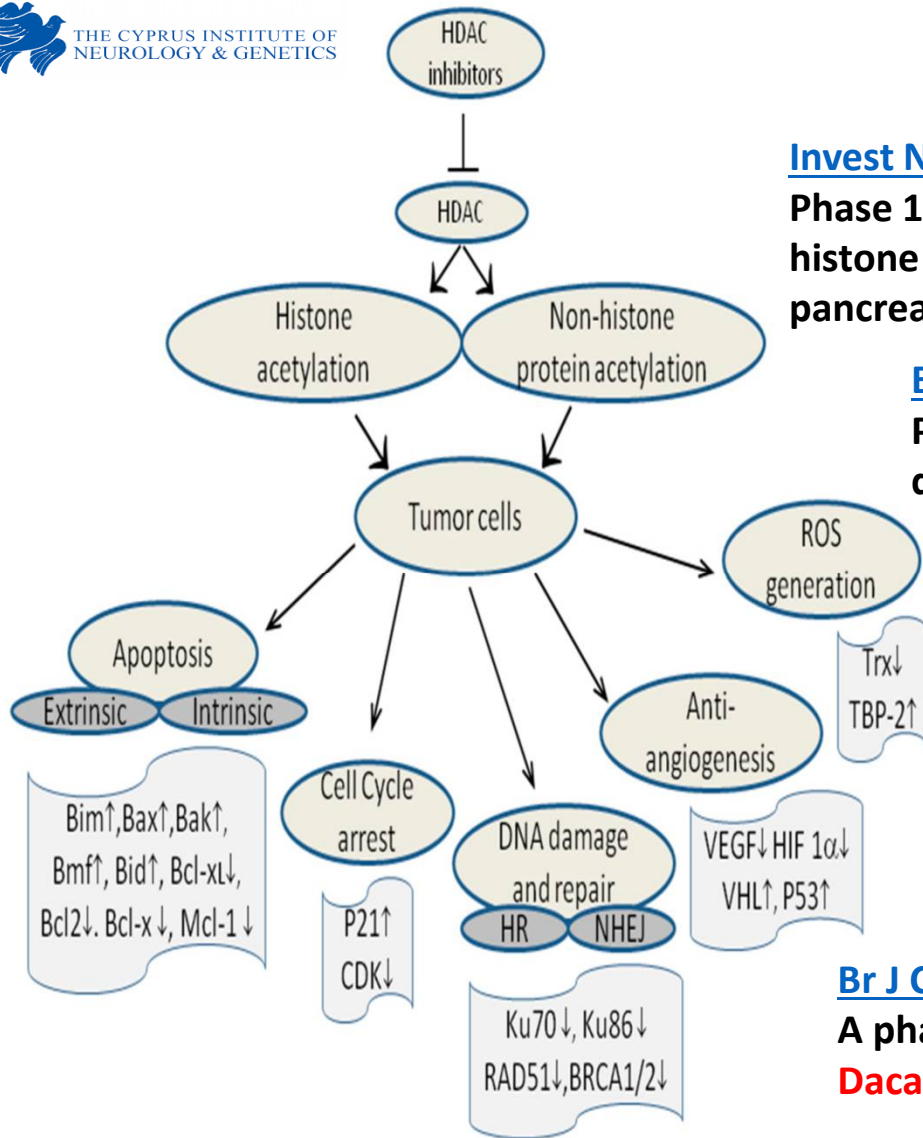

[Invest New Drugs.](#) 2012 Dec;30(6):2303-2317.

Phase 1 clinical trial of the novel proteasome inhibitor **Marizomib** with the histone deacetylase inhibitor **Vorinostat** in patients with melanoma, pancreatic and lung cancer based on in vitro assessments of the combination.

[Br J Cancer.](#) 2009 Oct 6;101(7):1044-1050.

Phase I trial of **Vorinostat** and **Doxorubicin** in solid tumours: histone deacetylase 2 expression as a predictive marker.

[Melanoma Res.](#) 2008 Aug;18(4):274-27

Multi-center phase II trial of the histone deacetylase inhibitor **Entinostat** in pre-treated metastatic melanoma.

[Clin Cancer Res.](#) 2009 Apr 1;15(7):2479-2487.

Potential of a topoisomerase I inhibitor, **Karenitecin**, by the histone deacetylase inhibitor **Valproic acid** in melanoma: translational and phase I/II clinical trial.

[Br J Cancer.](#) 2009 Jan 13;100(1):28-36.

A phase I-II study of the histone deacetylase inhibitor **Valproic acid** plus **Dacarbazine** and **Interferon-α** in patients with advanced melanoma.

# Acknowledgements

## Funding Agencies

## Current and Past Lab Members

## Network of Collaborators

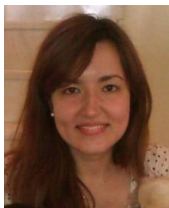

**Dr Theodora Mantso**

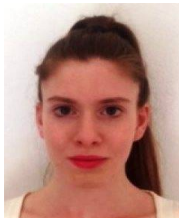

**Dr Melinna Mitsiogianni**

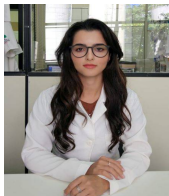

**Dr Natalia Ferreira**

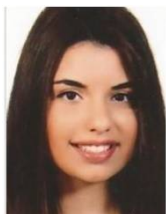

**Ms Venetia Tragkola**

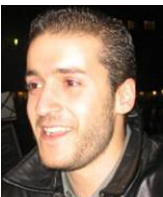

**Dr Ioannis Anestopoulos**

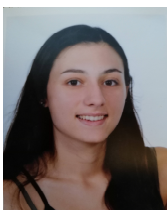

**Ms Eleni Tzika**

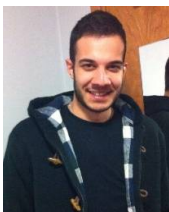

**Dr Sotiris Kyriakou**

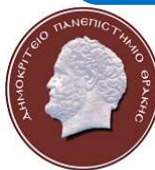

**Drs Pappa, Botaitis, Chlichia**

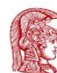

HELLENIC REPUBLIC  
National and Kapodistrian  
University of Athens

**Dr Trafalis**

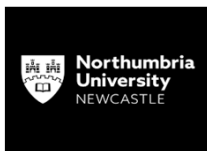

**Drs Tetard, Kazhevnikov, Birkett, Veuger**

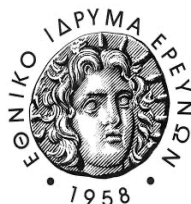

**Prof Zoumpourlis**

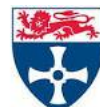

Newcastle  
University

**Dr Bronowska**

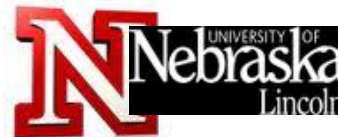

**Dr Franco**

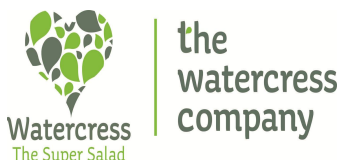

**Mr Amery**

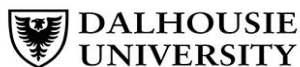

**Prof Rupasinghe**

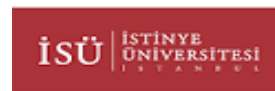

**Prof Ulukaya**

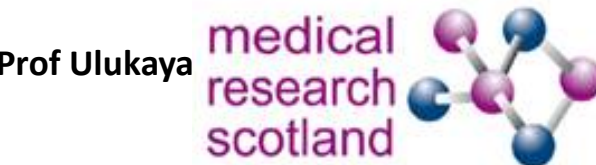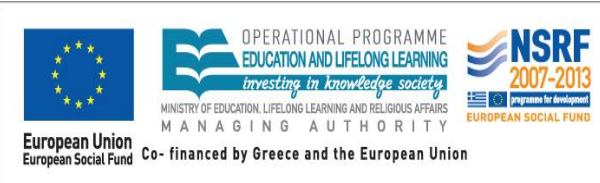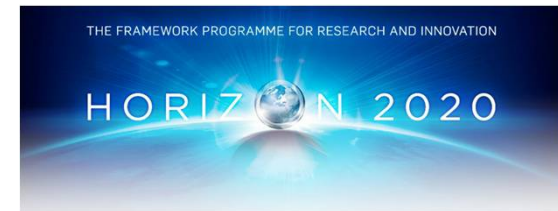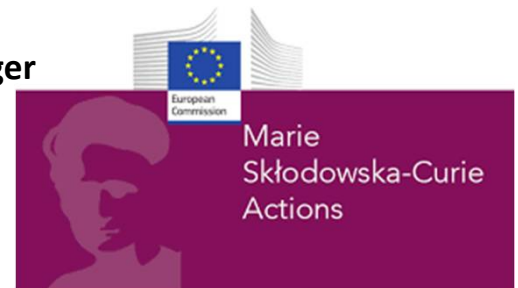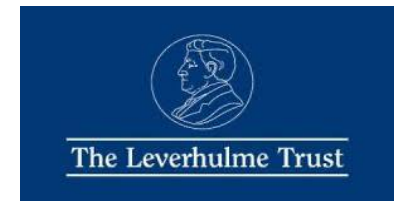

Supplement: s1 [file s1]
